# Supplementary material
Source: PubMed Central journal article supplement (PMC4255241)

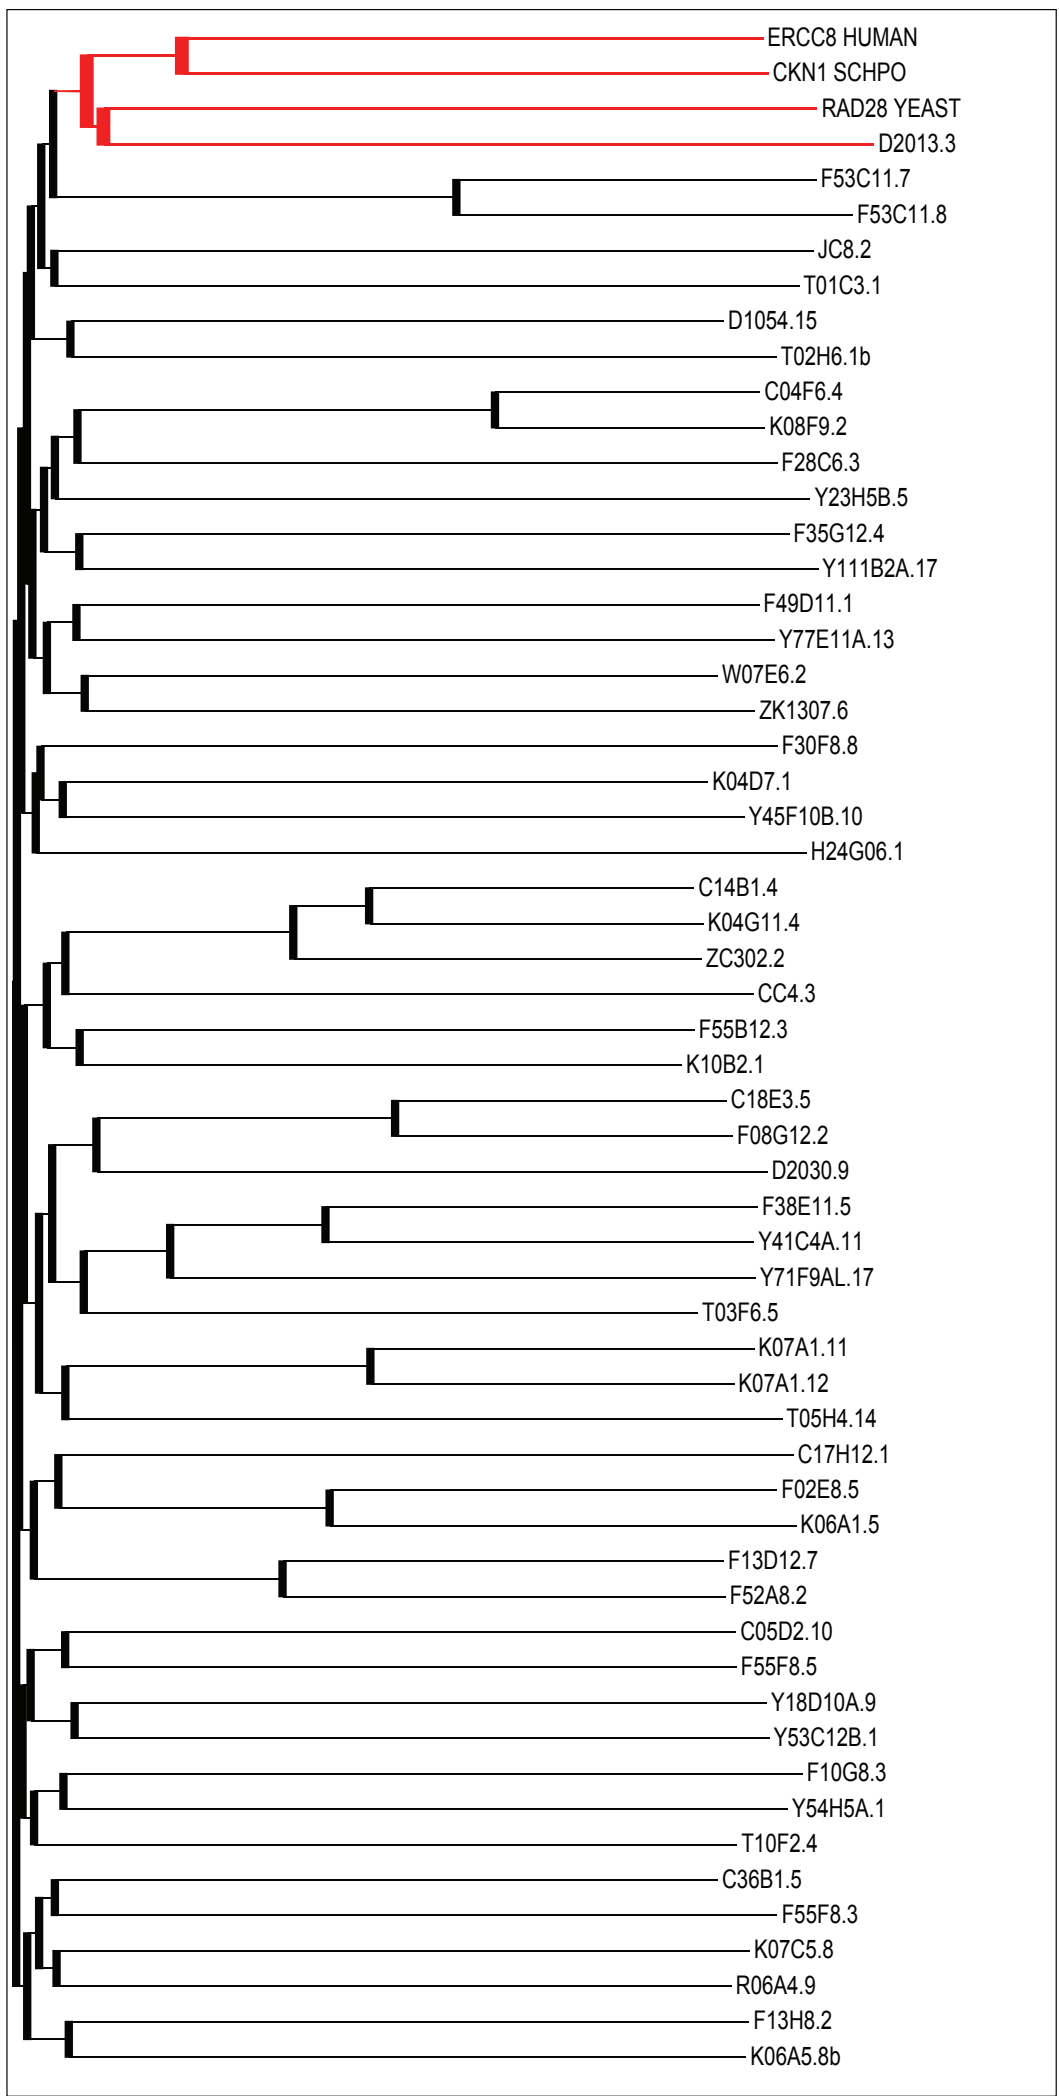

Supplement: NIHMS60561-supplement-Supplementary_Figure_1.pdf [file NIHMS60561-supplement-Supplementary_Figure_1.pdf]
